# Supplementary material for: QTL-mapping in the obese Berlin Fat Mouse identifies additional candidate genes for obesity and fatty liver disease
Source: Sci Rep. 2022 Jun 21;12:10471. doi: 10.1038/s41598-022-14316-5 (PMC9213485; doi:10.1038/s41598-022-14316-5)
Supplement: Supplementary file 4 — Supplementary Information 4. [file 41598_2022_14316_MOESM4_ESM.xlsx]

## Sheet: Tabelle1
	Table S2. Polymorphic positional candidate genes scored according to the decision tree.
ensembl_gene_id	Chromosome name	Mgi symbol	SIFT del	SIFT tol	Stop gained	UTRs	Promoter	CTCF.B.site	Enhancer	DOMAIN	Expression	Annotation	SCORE
ENSMUSG00000026587	1	Astn1	3	0	0	1	3	1	1	3	0	0	12
ENSMUSG00000026589	1	Sec16b	3	0	0	1	3	1	1	0	0	1	10
ENSMUSG00000004031	1	Brinp2	3	0	0	0	3	0	0	3	0	0	9
ENSMUSG00000015829	1	Tnr	3	0	0	0	3	0	0	3	0	0	9
ENSMUSG00000040782	1	Cop1	3	0	0	0	3	0	0	3	0	0	9
ENSMUSG00000043467	1	Zbtb37	0	1	0	1	3	1	0	3	0	0	9
ENSMUSG00000026701	1	Prdx6	0	1	0	0	3	0	0	3	2	0	9
ENSMUSG00000040297	1	Suco	0	1	0	0	3	0	0	3	2	0	9
ENSMUSG00000070565	1	Rasal2	0	1	0	1	3	1	0	0	2	0	8
ENSMUSG00000026708	1	Cenpl	0	1	0	1	3	0	0	3	0	0	8
ENSMUSG00000026725	1	Tnn	0	1	0	1	3	0	0	3	0	0	8
ENSMUSG00000026715	1	Serpinc1	0	0	0	1	3	1	1	0	2	0	8
ENSMUSG00000026721	1	Rabgap1l	0	0	0	1	3	1	1	0	2	0	8
ENSMUSG00000052534	1	Pbx1	0	0	0	1	3	1	1	0	0	1	7
ENSMUSG00000026705	1	Klhl20	0	0	0	1	3	1	1	0	0	0	6
ENSMUSG00000040265	1	Dnm3	0	0	0	1	3	1	1	0	0	0	6
ENSMUSG00000026586	1	Prrx1	0	0	0	1	3	1	1	0	0	0	6
ENSMUSG00000073530	1	Pappa2	0	1	0	1	0	0	0	3	0	0	5
ENSMUSG00000090394	1	4930523C07Rik	0	0	0	1	3	0	0	0	0	0	4
ENSMUSG00000058267	1	Mrps14	0	0	0	1	3	0	0	0	0	0	4
ENSMUSG00000014226	1	Cacybp	0	0	0	1	3	0	0	0	0	0	4
ENSMUSG00000044835	1	Ankrd45	0	0	0	1	3	0	0	0	0	0	4
ENSMUSG00000086277	1	4930558K02Rik	0	1	0	1	0	0	0	0	2	0	4
ENSMUSG00000040423	1	Rc3h1	0	0	0	1	0	1	1	0	0	0	3
ENSMUSG00000026692	1	Fmo4	0	0	0	1	0	0	0	0	2	0	3
ENSMUSG00000071890	1	Mroh9	0	0	0	1	0	0	0	0	2	0	3
ENSMUSG00000026698	1	Pigc	0	0	0	1	0	0	0	0	0	1	2
ENSMUSG00000026709	1	Dars2	0	0	0	1	0	0	0	0	0	0	1
ENSMUSG00000049160	1	Tex50	0	0	0	1	0	0	0	0	0	0	1
ENSMUSG00000037016	3	Frem2	3	0	0	1	3	1	1	3	0	1	13
ENSMUSG00000037325	3	Bbs7	0	1	0	1	3	1	0	3	2	1	12
ENSMUSG00000023087	3	Noct	0	1	0	1	3	1	1	3	2	0	12
ENSMUSG00000037270	3	4932438A13Rik	3	0	0	0	3	0	0	3	2	0	11
ENSMUSG00000051444	3	Bbs12	0	1	0	0	3	0	1	3	2	1	11
ENSMUSG00000044864	3	Ankrd50	0	1	0	0	3	1	1	3	2	0	11
ENSMUSG00000027719	3	Adad1	0	1	0	1	3	0	0	3	2	0	10
ENSMUSG00000027722	3	Spata5	0	1	0	1	3	1	1	3	0	0	10
ENSMUSG00000046743	3	Fat4	0	1	0	1	3	1	1	3	0	0	10
ENSMUSG00000037161	3	Mgarp	0	1	0	1	3	0	0	3	2	0	10
ENSMUSG00000074604	3	Mgst2	0	1	0	1	0	1	1	3	2	0	9
ENSMUSG00000027718	3	Il21	3	0	0	1	0	0	0	3	2	0	9
ENSMUSG00000027679	3	Dnajc19	3	0	0	1	3	0	0	0	2	0	9
ENSMUSG00000027744	3	Stoml3	3	0	0	1	0	1	1	3	0	0	9
ENSMUSG00000027714	3	Exosc9	0	1	0	1	3	0	0	3	0	0	8
ENSMUSG00000037892	3	Pcdh18	0	1	0	1	3	0	0	3	0	0	8
ENSMUSG00000027737	3	Slc7a11	0	0	0	1	3	1	1	0	2	0	8
ENSMUSG00000037174	3	Elf2	0	0	0	1	3	1	1	0	2	0	8
ENSMUSG00000027720	3	Il2	0	1	0	1	0	0	0	3	2	0	7
ENSMUSG00000037225	3	Fgf2	0	1	0	1	3	1	1	0	0	0	7
ENSMUSG00000050174	3	Nudt6	0	1	0	1	3	0	0	0	2	0	7
ENSMUSG00000044167	3	Foxo1	0	0	0	1	3	0	0	0	2	1	7
ENSMUSG00000027742	3	Cog6	0	1	0	1	0	1	1	3	0	0	7
ENSMUSG00000027715	3	Ccna2	0	0	0	1	3	0	0	0	2	0	6
ENSMUSG00000027716	3	Trpc3	0	0	0	1	3	0	0	0	2	0	6
ENSMUSG00000045031	3	Cetn4	0	0	0	1	3	0	0	0	2	0	6
ENSMUSG00000037211	3	Spry1	0	0	0	1	3	0	0	0	2	0	6
ENSMUSG00000058174	3	Gm5148	0	0	0	1	3	0	0	0	2	0	6
ENSMUSG00000063273	3	Naa15	0	0	0	1	3	0	0	0	2	0	6
ENSMUSG00000027739	3	Rab33b	0	0	0	1	3	1	1	0	0	0	6
ENSMUSG00000061143	3	Maml3	0	0	0	1	3	1	1	0	0	0	6
ENSMUSG00000048332	3	Lhfp	0	0	0	1	3	1	1	0	0	0	6
ENSMUSG00000027712	3	Anxa5	0	0	0	1	3	0	0	0	0	0	4
ENSMUSG00000085007	3	Gm11549	0	0	0	1	3	0	0	0	0	0	4
ENSMUSG00000049504	3	Proser1	0	1	0	0	0	0	0	3	0	0	4
ENSMUSG00000090919	3	Pabpc4l	0	0	0	1	0	0	0	0	2	0	3
ENSMUSG00000037152	3	Ndufc1	0	0	0	1	0	0	0	0	0	0	1
ENSMUSG00000027746	3	Ufm1	0	0	0	1	0	0	0	0	0	0	1
ENSMUSG00000009376	6	Met	0	1	0	1	0	1	1	3	2	1	10
ENSMUSG00000062995	6	Ica1	0	0	0	1	3	1	1	0	2	1	9
ENSMUSG00000079679	6	Vwde	3	0	0	1	0	0	0	3	0	0	7
ENSMUSG00000032757	6	Bet1	0	0	0	1	3	0	0	0	2	0	6
ENSMUSG00000032827	6	Ppp1r9a	0	0	0	1	3	0	0	0	2	0	6
ENSMUSG00000029759	6	Pon3	0	0	0	1	3	0	0	0	2	0	6
ENSMUSG00000061762	6	Tac1	0	0	0	1	3	0	0	0	2	0	6
ENSMUSG00000046178	6	Nxph1	0	0	0	1	3	0	0	0	2	0	6
ENSMUSG00000032625	6	Thsd7a	0	0	0	1	3	0	0	0	2	0	6
ENSMUSG00000029571	6	Tmem106b	0	0	0	1	3	0	0	0	2	0	6
ENSMUSG00000029569	6	Tmem168	0	0	0	1	3	0	0	0	2	0	6
ENSMUSG00000007655	6	Cav1	0	0	0	1	3	0	0	0	2	0	6
ENSMUSG00000092035	6	Peg10	0	1	0	1	0	0	0	3	0	0	5
ENSMUSG00000042717	6	Ppp1r3a	0	0	0	1	0	0	0	0	2	1	4
ENSMUSG00000029563	6	Foxp2	0	0	0	1	3	0	0	0	0	0	4
ENSMUSG00000032667	6	Pon2	0	0	0	1	0	1	1	0	0	0	3
ENSMUSG00000019577	6	Pdk4	0	0	0	1	0	0	0	0	2	0	3
ENSMUSG00000029754	6	Dlx6	0	0	0	1	0	0	0	0	2	0	3
ENSMUSG00000042505	6	Sdhaf3	0	0	0	1	0	0	0	0	2	0	3
ENSMUSG00000042460	6	C1galt1	0	0	0	1	0	0	0	0	2	0	3
ENSMUSG00000015189	6	Casd1	0	0	0	1	0	0	0	0	0	0	1
ENSMUSG00000029755	6	Dlx5	0	0	0	1	0	0	0	0	0	0	1
ENSMUSG00000055932	8	Fto	0	1	3	1	3	1	1	3	2	1	16
ENSMUSG00000033192	8	Lpcat2	3	0	0	1	3	1	1	3	0	1	13
ENSMUSG00000031789	8	Cngb1	0	1	0	1	3	1	1	3	2	0	12
ENSMUSG00000055994	8	Nod2	3	0	0	1	3	1	1	3	0	0	12
ENSMUSG00000056608	8	Chd9	0	1	0	1	3	1	1	3	2	0	12
ENSMUSG00000031666	8	Rbl2	0	1	0	1	3	1	1	3	2	0	12
ENSMUSG00000033282	8	Rpgrip1l	0	1	0	1	3	1	1	3	2	0	12
ENSMUSG00000031770	8	Herpud1	3	0	0	1	3	0	0	3	2	0	12
ENSMUSG00000057400	8	Ces1c	3	0	0	1	3	0	0	3	0	1	11
ENSMUSG00000074151	8	Nlrc5	3	0	0	1	0	1	1	3	2	0	11
ENSMUSG00000031659	8	Adcy7	0	1	0	1	3	0	0	3	2	1	11
ENSMUSG00000031662	8	Snx20	0	1	0	1	3	0	0	3	2	0	10
ENSMUSG00000036534	8	Slc38a7	0	1	0	1	3	0	0	3	2	0	10
ENSMUSG00000071047	8	Ces1a	3	0	0	1	0	1	1	3	0	1	10
ENSMUSG00000078964	8	Ces1b	3	0	0	1	0	0	0	3	2	1	10
ENSMUSG00000031665	8	Sall1	3	0	0	0	3	0	0	3	0	0	9
ENSMUSG00000031671	8	Setd6	3	0	0	0	3	0	0	3	0	0	9
ENSMUSG00000031660	8	Brd7	0	0	0	1	3	1	1	0	2	0	8
ENSMUSG00000043668	8	Tox3	0	0	0	1	3	1	1	0	2	0	8
ENSMUSG00000031667	8	Aktip	0	1	0	1	3	0	0	3	0	0	8
ENSMUSG00000074156	8	Ces1h	3	0	0	0	0	0	0	3	2	0	8
ENSMUSG00000031748	8	Gnao1	0	0	0	1	3	1	1	0	2	0	8
ENSMUSG00000031760	8	Mt3	0	1	0	1	3	0	0	3	0	0	8
ENSMUSG00000034361	8	Cpne2	0	0	0	1	3	1	1	0	2	0	8
ENSMUSG00000031734	8	Irx3	0	1	0	1	3	0	0	0	2	0	7
ENSMUSG00000031737	8	Irx5	0	1	0	1	3	0	0	0	2	0	7
ENSMUSG00000031669	8	Gins3	0	1	0	1	3	0	0	0	2	0	7
ENSMUSG00000031661	8	Nkd1	0	0	0	1	3	1	1	0	0	0	6
ENSMUSG00000036712	8	Cyld	0	0	0	1	3	1	1	0	0	0	6
ENSMUSG00000031740	8	Mmp2	0	0	0	1	3	0	0	0	2	0	6
ENSMUSG00000055368	8	Slc6a2	0	0	0	1	3	1	1	0	0	0	6
ENSMUSG00000056973	8	Ces1d	0	1	0	0	0	0	0	3	2	0	6
ENSMUSG00000031751	8	Amfr	0	0	0	1	3	0	0	0	2	0	6
ENSMUSG00000031766	8	Slc12a3	0	0	0	1	3	1	1	0	0	0	6
ENSMUSG00000031774	8	Fam192a	0	0	0	1	3	0	0	0	2	0	6
ENSMUSG00000031781	8	Ciapin1	0	0	0	1	3	0	0	0	2	0	6
ENSMUSG00000031782	8	Coq9	0	0	0	1	3	0	0	0	2	0	6
ENSMUSG00000061577	8	Adgrg5	0	0	0	1	3	0	0	0	2	0	6
ENSMUSG00000031788	8	Kifc3	0	0	0	1	3	1	1	0	0	0	6
ENSMUSG00000031796	8	Cfap20	0	0	0	1	3	0	0	0	2	0	6
ENSMUSG00000046707	8	Csnk2a2	0	0	0	1	3	0	0	0	2	0	6
ENSMUSG00000036550	8	Cnot1	0	0	0	1	3	0	0	0	2	0	6
ENSMUSG00000031738	8	Irx6	0	1	0	1	0	0	0	3	0	0	5
ENSMUSG00000110332	8	Gm19935	0	0	0	1	3	0	0	0	0	0	4
ENSMUSG00000078144	8	Capns2	3	0	0	1	0	0	0	0	0	0	4
ENSMUSG00000057074	8	Ces1g	0	1	0	0	0	0	0	3	0	0	4
ENSMUSG00000031754	8	Nudt21	0	0	0	1	3	0	0	0	0	0	4
ENSMUSG00000031755	8	Bbs2	0	0	0	1	3	0	0	0	0	0	4
ENSMUSG00000031762	8	Mt2	0	0	0	1	3	0	0	0	0	0	4
ENSMUSG00000031780	8	Ccl17	0	0	0	1	3	0	0	0	0	0	4
ENSMUSG00000040631	8	Dok4	0	0	0	1	3	0	0	0	0	0	4
ENSMUSG00000031783	8	Polr2c	0	0	0	1	3	0	0	0	0	0	4
ENSMUSG00000031785	8	Adgrg1	0	0	0	1	3	0	0	0	0	0	4
ENSMUSG00000036564	8	Ndrg4	0	0	0	1	3	0	0	0	0	0	4
ENSMUSG00000031672	8	Got2	0	0	0	1	0	0	0	0	2	1	4
ENSMUSG00000033009	8	Ogfod1	0	0	0	1	0	0	0	0	2	0	3
ENSMUSG00000031757	8	Mt4	0	0	0	1	0	0	0	0	2	0	3
ENSMUSG00000031765	8	Mt1	0	0	0	1	0	0	0	0	2	0	3
ENSMUSG00000031787	8	Katnb1	0	0	0	1	0	0	0	0	2	0	3
ENSMUSG00000031790	8	Mmp15	0	0	0	1	0	1	1	0	0	0	3
ENSMUSG00000048400	8	Prss54	0	1	0	0	0	0	0	0	2	0	3
ENSMUSG00000046556	8	Zfp319	0	0	0	1	0	0	0	0	0	0	1
ENSMUSG00000031792	8	Usb1	0	0	0	1	0	0	0	0	0	0	1
	Abbreviations: SIFT del, SIFT deleterious; SIFT tol, SIFT tolerated; CTCF.B.site, CTCF binding site.
